# Supplementary material
Source: Springer Nature journal article supplement (https://www.springermedizin.de/resource/supplementary/13024_2014_560_MOESM7_ESM.pdf/9644392)

WT cortex

Tau<sup>-/-</sup> cortex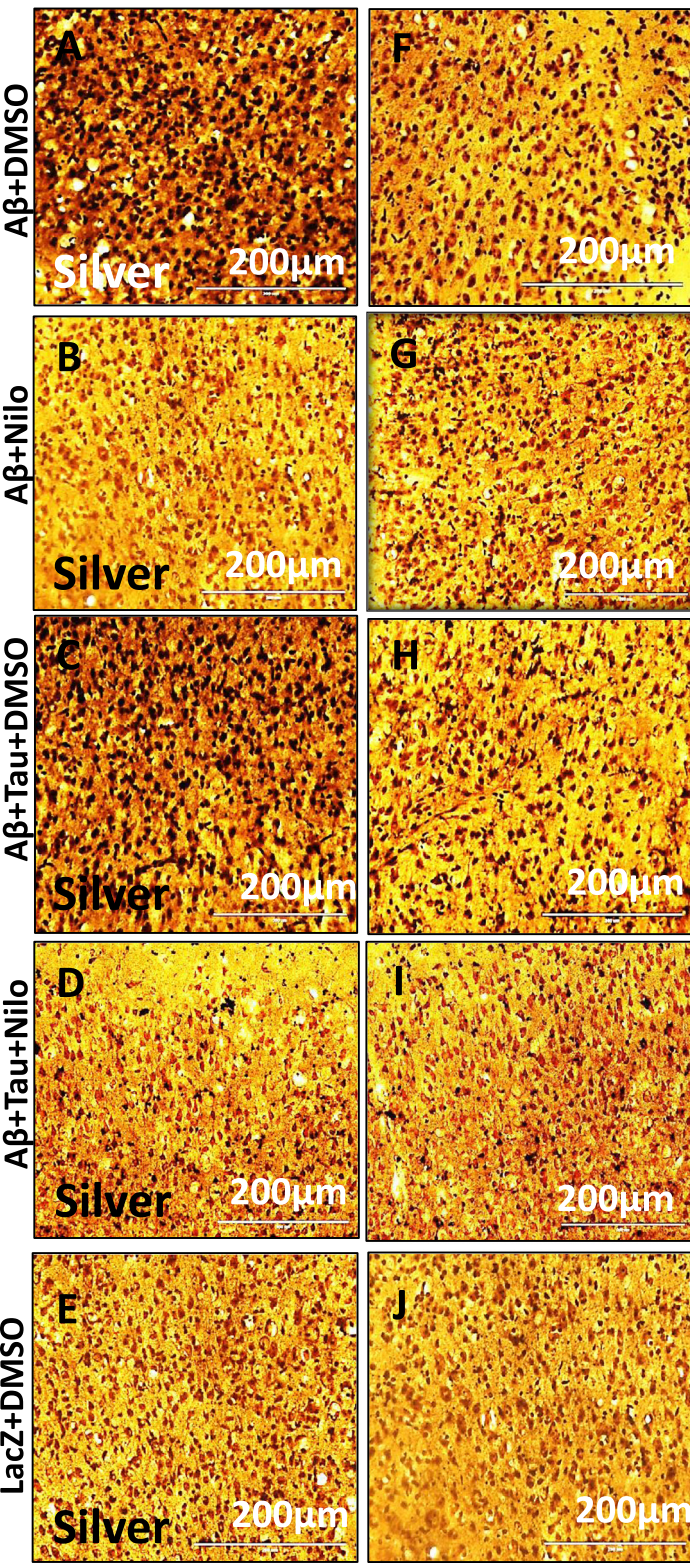

K

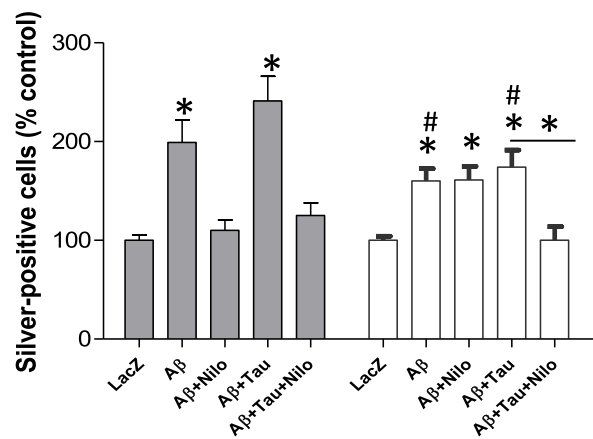

L

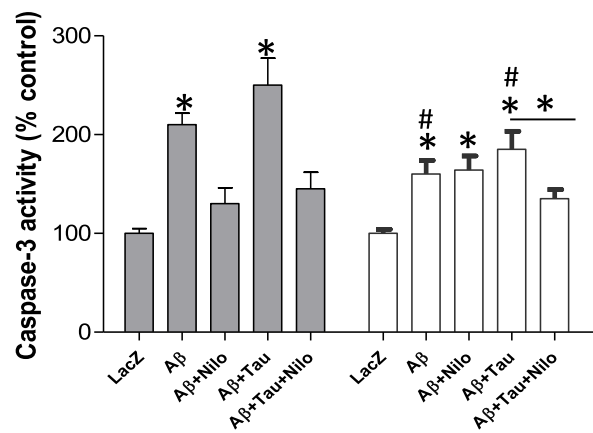

Supplement: MOESM7 [file 9644392]
